# Supplementary material for: A Phase 1, Randomized, Double-Blinded, Placebo-Controlled and Dose-Escalation Study to Evaluate the Safety and Immunogenicity of the Intranasal DelNS1-nCoV-RBD LAIV for COVID-19 in Healthy Adults
Source: MDPI journal article supplement (doi:10.3390/vaccines11040723), 2023-03-24
Supplement: s1 [file s1]

---

**Supplementary File: Laboratory Assays.****Methods***Treatment of saliva for enzyme immunoassay*

Saliva specimens were collected using Salivette® (SARSTEDT, Nümbrecht, Germany). Saliva specimens were centrifuged at  $1000 \times g$  for 2 min, and then stored at  $-80^{\circ}\text{C}$  until testing. On the day of testing, the saliva specimen was thawed and then centrifuged at 8500 rpm for 4 min. Saliva supernatant was treated with 1% Triton X-100 at room temperature for 30 min and diluted 1:1 with phosphate buffered saline (PBS).

*Enzyme immunoassay for the detection of saliva total immunoglobulin*

Enzyme immunoassay for the detection of saliva immunoglobulin was performed as described previously with modifications [1]. 96-well Nunc Maxisorp™ plates (Thermo Fisher Scientific; Cat#4424-04) were coated with either 200 ng/well (used for saliva pre-absorption) or 100 ng/well (used for enzyme immunoassay). Pierce™ avidin (Thermo Fisher Scientific; Cat#21121) in 50  $\mu\text{L}$  0.05 M carbonate-bicarbonate buffer at  $4^{\circ}\text{C}$  for 16 hours and then blocked with blocking agent at  $37^{\circ}\text{C}$  for 2 hours. 100 ng biotinylated recombinant SARS-CoV-2 RBD (ABclonal; Cat#RP02326) in 50  $\mu\text{L}$   $1\times$  PBS were added to the wells with 200 ng avidin/well. For control wells, PBS was added instead biotinylated recombinant SARS CoV-2 RBD. The plates were incubated at room temperature for 30 min with shaking followed by washing. 50  $\mu\text{L}$ -treated saliva was added to the wells with or without biotinylated RBD. For each plate, saliva specimen from an individual who has received BNT162b2 vaccine was added as a control. Antibody binding was performed for one hour with shaking at room temperature. After washing, 50  $\mu\text{L}$ /well horseradish peroxidase conjugated goat anti-human IgG, IgM and IgA (Thermo Fisher Scientific; Cat#A18847) at a dilution of 1:2000 was added and incubated at room temperature for 30 min with shaking. 100  $\mu\text{L}$  3,3',5,5'-tetramethylbenzidine single solution (Thermo Fisher Scientific; Cat#002023) was added to each well for signal development at dark for 10 minutes which was then stopped with 100  $\mu\text{L}$  0.3M sulfuric acid. The optical density (OD) was read at 450 and 620 nm.

**Reference**

- 1 Isho, B.; Abe, K.T.; Zuo, M.; Jamal, A.J.; Rathod, B.; Wang, J.H.; Li, Z.; Chao, G.; Rojas, O.L.; Bang, Y.M.; et al. Persistence of serum and saliva antibody responses to SARS-CoV-2 spike antigens in COVID-19 patients. *Sci. Immunol.* **2020**, *5*, eabe5511. <https://doi.org/10.1126/sciimmunol.abe5511>.
